# Supplementary material
Source: MDPI journal article supplement (https://www.mdpi.com/2076-3417/13/3/1498)
Supplement: s1 [file s1]

**Supplementary Table S1 - Within group comparisons of  $\Delta E$  values before and after immersion**

|         |   |                | Mean  | SD   | Mean difference | P Value | Interpretation |
|---------|---|----------------|-------|------|-----------------|---------|----------------|
| GROUP A | 1 | delta E before | 42.95 | 0.53 | 3.73            | 0.043   | Significant    |
|         |   | delta E after  | 39.21 | 0.65 |                 |         |                |
|         | 2 | delta E before | 42.83 | 0.81 | 9.74            | 0.043   | Significant    |
|         |   | delta E after  | 33.09 | 0.42 |                 |         |                |
|         | 3 | delta E before | 42.68 | 1.00 | -28.70          | 0.043   | Significant    |
|         |   | delta E after  | 71.38 | 1.83 |                 |         |                |
|         | 4 | delta E before | 43.08 | 1.13 | 13.30           | 0.043   | Significant    |
|         |   | delta E after  | 29.78 | 1.18 |                 |         |                |
| GROUP B | 1 | delta E before | 33.41 | 0.45 | 2.66            | 0.043   | Significant    |
|         |   | delta E after  | 30.74 | 0.43 |                 |         |                |
|         | 2 | delta E before | 33.44 | 0.44 | -6.10           | 0.043   | Significant    |
|         |   | delta E after  | 39.54 | 0.78 |                 |         |                |
|         | 3 | delta E before | 33.19 | 0.55 | -41.19          | 0.043   | Significant    |
|         |   | delta E after  | 74.38 | 2.76 |                 |         |                |
|         | 4 | delta E before | 34.12 | 0.91 | 14.95           | 0.043   | Significant    |
|         |   | delta E after  | 19.17 | 1.06 |                 |         |                |
| GROUP C | 1 | delta E before | 49.28 | 0.26 | 1.72            | 0.043   | Significant    |
|         |   | delta E after  | 47.56 | 0.63 |                 |         |                |
|         | 2 | delta E before | 49.17 | 0.25 | 9.16            | 0.043   | Significant    |
|         |   | delta E after  | 40.01 | 1.46 |                 |         |                |
|         | 3 | delta E before | 49.54 | 0.32 | 23.88           | 0.043   | Significant    |
|         |   | delta E after  | 73.42 | 3.29 |                 |         |                |
|         | 4 | delta E before | 48.83 | 0.27 | 10.94           | 0.043   | Significant    |
|         |   | delta E after  | 37.88 | 0.52 |                 |         |                |

SD- Standard Deviation

**Supplementary Table S2- Overall comparison of difference in  $\Delta E$  between the groups**

|         | MEAN DELTA<br>E DIFFERENCE | STANDARD<br>DEVIATION | P VALUE | INTERPRETATION     |
|---------|----------------------------|-----------------------|---------|--------------------|
| GROUP A | 13.87                      | 9.50                  | 0.428   | NOT<br>SIGNIFICANT |
| GROUP B | 16.23                      | 15.55                 |         |                    |
| GROUP C | 11.43                      | 8.34                  |         |                    |

**Supplementary Table S3-** Comparison of difference in  $\Delta E$  in between the subgroups

| SUBGROUP       |                            |  |  | GROUP A     | GROUP B     | GROUP C     |
|----------------|----------------------------|--|--|-------------|-------------|-------------|
| 1              | Mean $\Delta E$ difference |  |  | 3.73        | 2.66        | 1.72        |
|                | N                          |  |  | 5.00        | 5.00        | 5.00        |
|                | Std. Deviation             |  |  | 0.96        | 0.68        | 0.61        |
| 2              | Mean $\Delta E$ difference |  |  | 9.74        | -6.10       | 9.16        |
|                | N                          |  |  | 5.00        | 5.00        | 5.00        |
|                | Std. Deviation             |  |  | 0.97        | 0.90        | 1.54        |
| 3              | Mean $\Delta E$ difference |  |  | -28.70      | -41.19      | -23.88      |
|                | N                          |  |  | 5.00        | 5.00        | 5.00        |
|                | Std. Deviation             |  |  | 1.11        | 2.41        | 3.01        |
| 4              | Mean                       |  |  | 13.30       | 14.95       | 10.94       |
|                | N                          |  |  | 5.00        | 5.00        | 5.00        |
|                | Std. Deviation             |  |  | 0.63        | 1.40        | 0.75        |
| P VALUE        |                            |  |  | <0.001      | <0.001      | 0.001       |
| INTERPRETATION |                            |  |  | SIGNIFICANT | SIGNIFICANT | SIGNIFICANT |

**Supplementary Table S4-** Comparison of  $\Delta E$  difference in each staining solution between composite materials

|          |                       | GROUP A | GROUP B | GROUP C | P VALUE<br>(ANOVA) | PAIRWISE<br>COMPARISON (POST HOC<br>TEST SIGNIFICANCES) |
|----------|-----------------------|---------|---------|---------|--------------------|---------------------------------------------------------|
| <b>1</b> | <b>Mean</b>           | 3.73    | 2.66    | 1.72    | 0.018*             | b                                                       |
|          | <b>Std. Deviation</b> | 0.96    | 0.68    | 0.61    |                    |                                                         |
| <b>2</b> | <b>Mean</b>           | 9.74    | -6.10   | 9.16    | 0.009*             | a, c                                                    |
|          | <b>Std. Deviation</b> | 0.97    | 0.90    | 1.54    |                    |                                                         |
| <b>3</b> | <b>Mean</b>           | -28.7   | -41.2   | -23.9   | 0.002*             | a, b, c                                                 |
|          | <b>Std. Deviation</b> | 1.11    | 2.41    | 3.01    |                    |                                                         |
| <b>4</b> | <b>Mean</b>           | 13.30   | 14.95   | 10.94   | 0.003*             | b, c                                                    |
|          | <b>Std. Deviation</b> | 0.63    | 1.40    | 0.75    |                    |                                                         |

\* statistically significant; Difference between A and B- a; Difference between A and C- b; Difference between B and C- c

**Supplementary Table S5:** National Bureau of Standards (NBS) system of expressing color differences

| NBS Units  | Critical Remarks of Color Differences |
|------------|---------------------------------------|
| 0.0-0.5    | Excessively mere change               |
| 0.5-1.5    | Mere: Mere change                     |
| 1.5-3      | Noticeable: Perceivable change        |
| 3-6        | Appreciable: Prominent change         |
| 6-12       | Much: Excessively marked change       |
| 12 or more | Very much: Change to other color      |
